# Supplementary material for: High performance sulfonated poly(arylene ether phosphine oxide) membranes by self-protected cross-linking for fuel cells
Source: Royal Society of Chemistry journal article supplement (doi:10.1039/c2jm31659e), 2012-01-01
Supplement: c2jm31659e.pdf [file c2jm31659e.pdf]

## Supporting Information

### High performance sulfonated poly(arylene ether phosphine oxide)s membranes by self-protected crosslinking for fuel cells

Lingchao Fu, Guyu Xiao\* and Deyue Yan

College of Chemistry and Chemical Engineering, State Key Laboratory of Metal Matrix Composites, Shanghai Jiao Tong University, 800 Dongchuan Road, Shanghai 200240, PR China

**Fig. S1.**  $^{13}\text{C}$  and dept135 NMR spectra of PAEPO and sPAEPO-57.5.

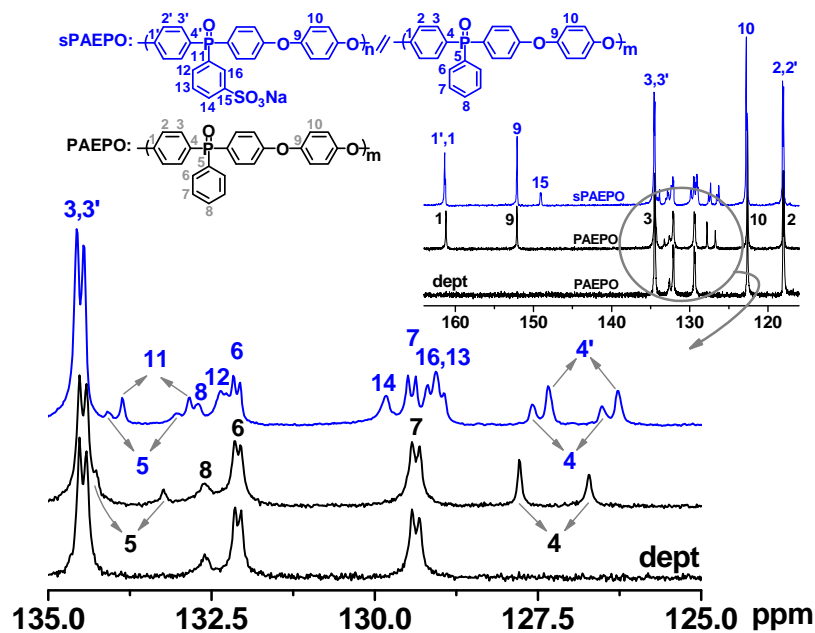

**Fig. S2.** FT-IR spectra of PAEPO, sPAEPO-57.5 and csPAEPO-57.5.

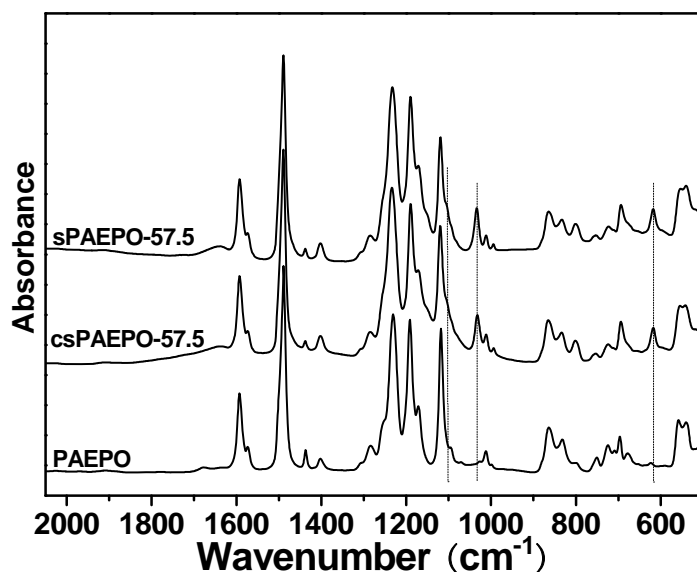

\* Corresponding author. E-mail: gyxiao@sjtu.edu.cn
